# Supplementary material for: Extraordinary clinical response to ibrutinib in low-grade ovarian cancer guided by organoid drug testing
Source: PubMed Central journal article supplement (PMC10195827; doi:10.1038/s41698-023-00379-8), 2023-05-18
Supplement: 41698_2023_379_MOESM1_ESM.pdf [file 41698_2023_379_MOESM1_ESM.pdf]

## Supplementary Table 1

List of drugs tested and SPM score

| Drug Name       | Alternate Names                                                     | Target                                          | SPM Score | CLIA Review Comments      |
|-----------------|---------------------------------------------------------------------|-------------------------------------------------|-----------|---------------------------|
| Ibrutinib       | Imbruvica, PCI-32765                                                | BTK                                             | 97.3      | Exceptional               |
| CPI-0610        | CPI0610                                                             | BET proteins - BRD2, BRD3, BRD4, BRDT           | 97.3      | Exceptional               |
| Afatinib        | Gilotrif, BIBW-2992, Giotrif (EU), Tovok, Tomtovok,                 | EGFR, HER2                                      | 95.95     | Exceptional               |
| Fluorouracil    | Adrucil, 5-FU                                                       | antimetabolite - thymidylate synthase inhibitor | 93.75     | False Positive            |
| Erlotinib HCl   | Tarceva, CP-358774, OSI-774, RG-1415, R-1415, NSC-718781, Ro50-8231 | EGFR, ALK, JAK2 mutant (JAK2V617F)              | 89.86     | Good                      |
| Gemcitabine HCl | Gemzar, Gemcitabine                                                 | antimetabolite - pyrimidine antagonist          | 88.75     | Low-see mention in report |
| Neratinib       | neratinib maleate, Nerlynx, PB-272, HKI-272, CAN-030                | EGFR, HER1, HER2, HER4                          | 87.16     | Good                      |
| Adavosertib     | AZD1775, MK-1775                                                    | Wee1                                            | 84.46     | Good                      |
| Capivasertib    | AZD-5363                                                            | Akt                                             | 80.41     | Moderate                  |
| Trametinib      | Mekinist, GSK-212, GSK-1120212, JTP-74057, TMT-212                  | MEK1, MEK2                                      | 74.32     | Low                       |
| Axitinib        | Inlyta, AG-013736, Inraita (Japan),                                 | VEGFR1, VEGFR2, VEGFR3 KIT, PDGFR, ABL1(T315I)  | 72.97     | Low                       |
| Methotrexate    | Methotrexate sodium                                                 | folic acid antagonist                           | 70        | NOT Sensitive             |
| Cobimetinib     | Cotellic, RG-7421, GDC-0973, XL-518                                 | MEK                                             | 69.59     | NOT Sensitive             |
| Endoxifen HCl   | Endoxifen                                                           | ER alpha, ER beta                               | 67.57     | NOT Sensitive             |
| Ceralasertib    | AZD-6738,                                                           | ATR                                             | 62.16     | NOT Sensitive             |

|                       |                                                                                                                                                   |                               |       |               |
|-----------------------|---------------------------------------------------------------------------------------------------------------------------------------------------|-------------------------------|-------|---------------|
| Ipatasertib           | RG-7440, GDC-0068                                                                                                                                 | pan-AKT                       | 61.49 | NOT Sensitive |
| Oxaliplatin           | Eloxatine, Elplat                                                                                                                                 | DNA synthesis inhibition      | 57.5  | NOT Sensitive |
| Palbociclib HCl       | Ibrance, PD-991, PD-0332991, PF-0332991, PF-332991, Paruboshikuribu (Japan), Iburansu (Japan), Palbociclib, PD0332991                             | CDK4, CDK6                    | 57.43 | NOT Sensitive |
| Alpelisib             | Piqray, BYL-719                                                                                                                                   | PI3K p110 $\alpha$            | 56.08 | NOT Sensitive |
| Dasatinib Monohydrate | Sprycel, BMS-354825, NSC-732517, Dasatinib                                                                                                        | BCR-ABL, SRC                  | 54.05 | NOT Sensitive |
| Paclitaxel            | paclitaxel (albumin-bound), Abraxane, ABI-007, nab-paclitaxel, albumin-bound paclitaxel, ABX, paclitaxel albumin-stabilized nanoparticle, Abraxus | microtubule inhibitor, taxane | 52.5  | NOT Sensitive |
| Rucaparib Phosphate   | Rubraca, PF-1367338, AG-14699, CO-338, Rucaparib                                                                                                  | PARP1, PARP2, PARP3           | 51.35 | NOT Sensitive |
| Venetoclax            | Venclexta, ABT-199, GDC-0199, RG-7601, BCL-2i, Venclyxto,                                                                                         | BCL2                          | 48.65 | NOT Sensitive |
| Talazoparib           | Talzenna, LT-673, BMN-673, MDV-3800                                                                                                               | PARP                          | 46.62 | NOT Sensitive |
| Vinorelbine Tartrate  | Navelbine, Vinorelbine                                                                                                                            | microtubule inhibitor         | 42.5  | NOT Sensitive |
| Belinostat            | Beleodaq, PXD101                                                                                                                                  | HDAC                          | 40.54 | NOT Sensitive |
| Niraparib Tosylate    | Zejula, MK-4827, ZL-2306, Niraparib                                                                                                               | PARP1, PARP2                  | 37.84 | NOT Sensitive |

|                 |                                                                               |                                                                                                                         |       |               |
|-----------------|-------------------------------------------------------------------------------|-------------------------------------------------------------------------------------------------------------------------|-------|---------------|
| Encorafenib     | Braftovi, NVP-LGX818, LGX-818, ONO-7702                                       | RAF kinase                                                                                                              | 36.49 | NOT Sensitive |
| Midostaurin     | Rydapt, PKC-412, CGP-41251                                                    | FLT3, PKC $\alpha$ , PKC $\beta$ , PKC $\gamma$ , SYK, Fik-1, Akt, PKA, c-KIT, FGFR, SRC, PDKR $\beta$ , VEGFR1, VEGFR2 | 34.46 | NOT Sensitive |
| Decitabine      | Dacogen, E7373                                                                | panDNMT                                                                                                                 | 33.78 | NOT Sensitive |
| Erdafitinib     | Balversa, JNJ-42756493, JNJ-493                                               | FGFR                                                                                                                    | 31.76 | NOT Sensitive |
| Olaparib        | Lynparza, MK-7339, AZD-2281, KU-0059436                                       | PARP                                                                                                                    | 31.08 | NOT Sensitive |
| SN-38           |                                                                               | topoisomerase I, active metabolite of irinotecan                                                                        | 28.75 | NOT Sensitive |
| Abemaciclib     | Verzenio, LY2835219, LY2835219, LY-2835219, Verzenios (EU)                    | CDK4, CDK6                                                                                                              | 27.7  | NOT Sensitive |
| Binimetinib     | Mektovi, MEK-162, ARRY-162, ARRY-438162, ONO-7703, Balimek (EU)               | MEK                                                                                                                     | 23.65 | NOT Sensitive |
| Alectinib       | Alecensa, AF802, CH5424802, RO5424802, RG7853                                 | ALK, HER2                                                                                                               | 22.97 | NOT Sensitive |
| Cediranib       | Recentin, Zemfirza                                                            | VEGFR                                                                                                                   | 22.97 | NOT Sensitive |
| Doxorubicin HCl | Doxil, pegylated liposomal doxorubicin hydrochloride, Caelyx (EU), Adriamycin | topoisomerase II inhibitor, anthracycline antitumor antibiotic                                                          | 16.25 | NOT Sensitive |
| Dabrafenib      | Tafinlar, GSK-2118436, GSK-436, DRB-436, Dabrafenib mesylate                  | BRAF                                                                                                                    | 14.19 | NOT Sensitive |

|             |                                                                                            |                                      |       |               |
|-------------|--------------------------------------------------------------------------------------------|--------------------------------------|-------|---------------|
| Everolimus  | Afinitor, Votubia (EU), Afinitor DISPERZ (everolimus tablets for oral suspension), RAD-001 | mTORC1                               | 12.16 | NOT Sensitive |
| Crizotinib  | Xalkori, PF-2341066, Zakori                                                                | ALK, ROS1, MET                       | 5.41  | NOT Sensitive |
| Fulvestrant | Faslodex                                                                                   | selective estrogen receptor degrader | 2.7   | NOT Sensitive |
